# Supplementary figures and images for: Transcriptomic Analysis of Porcine Granulosa Cells Overexpressing Retinol Binding Protein 4
Source: MDPI journal article supplement (doi:10.3390/genes10080615), 2019-08-13

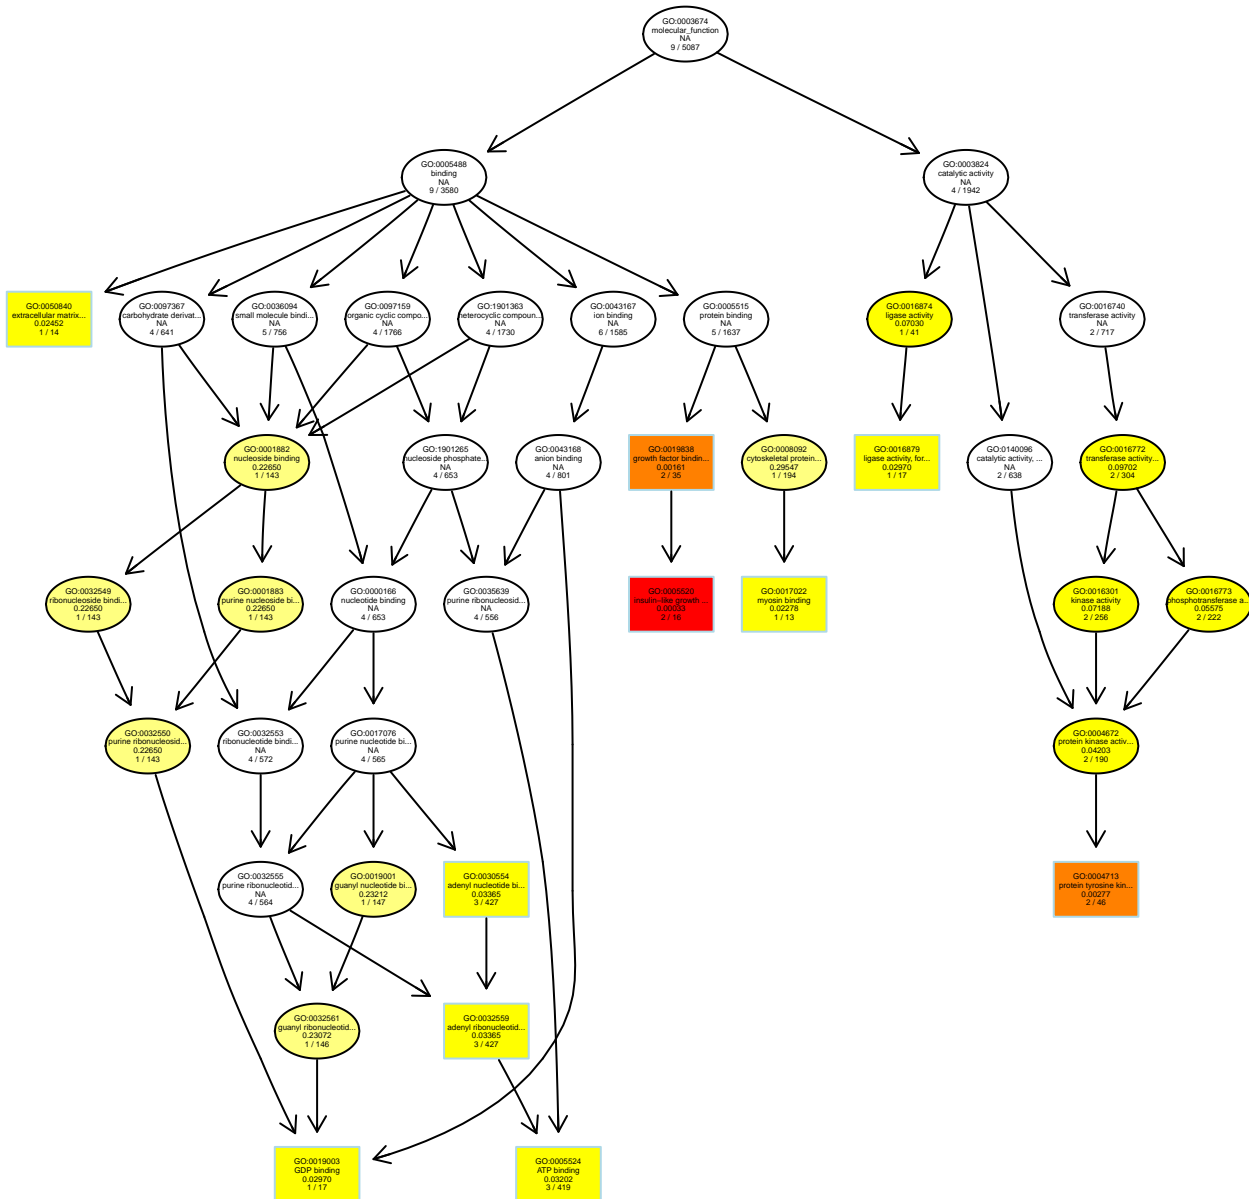

Supplement: s1 [file s1]

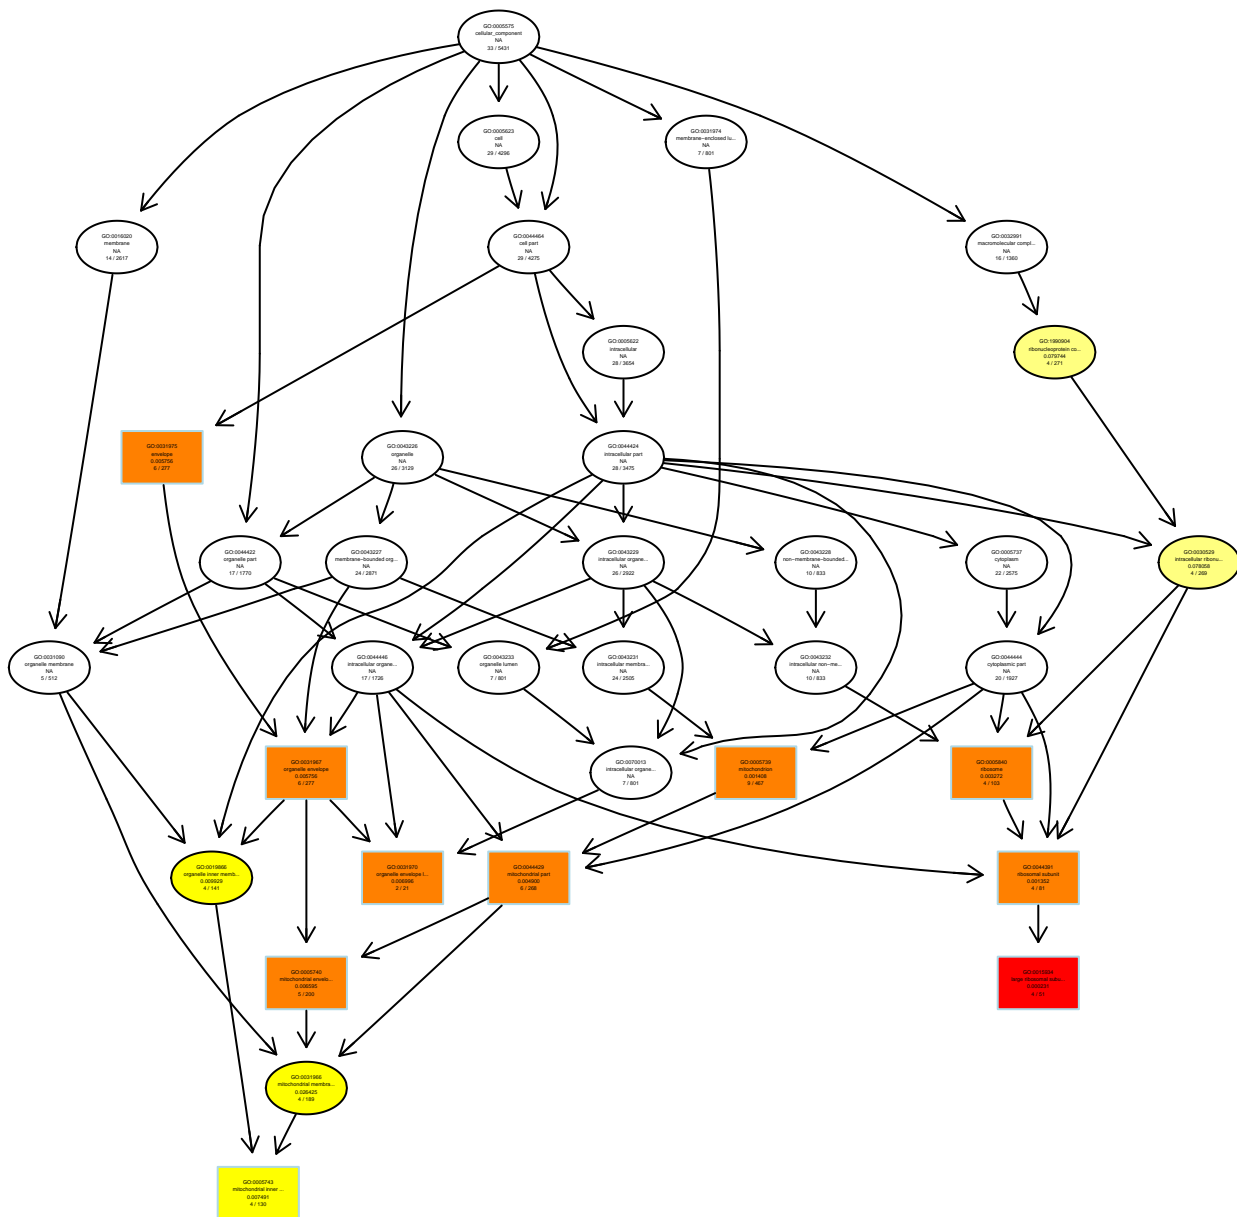

Supplement: s1 [file s1]

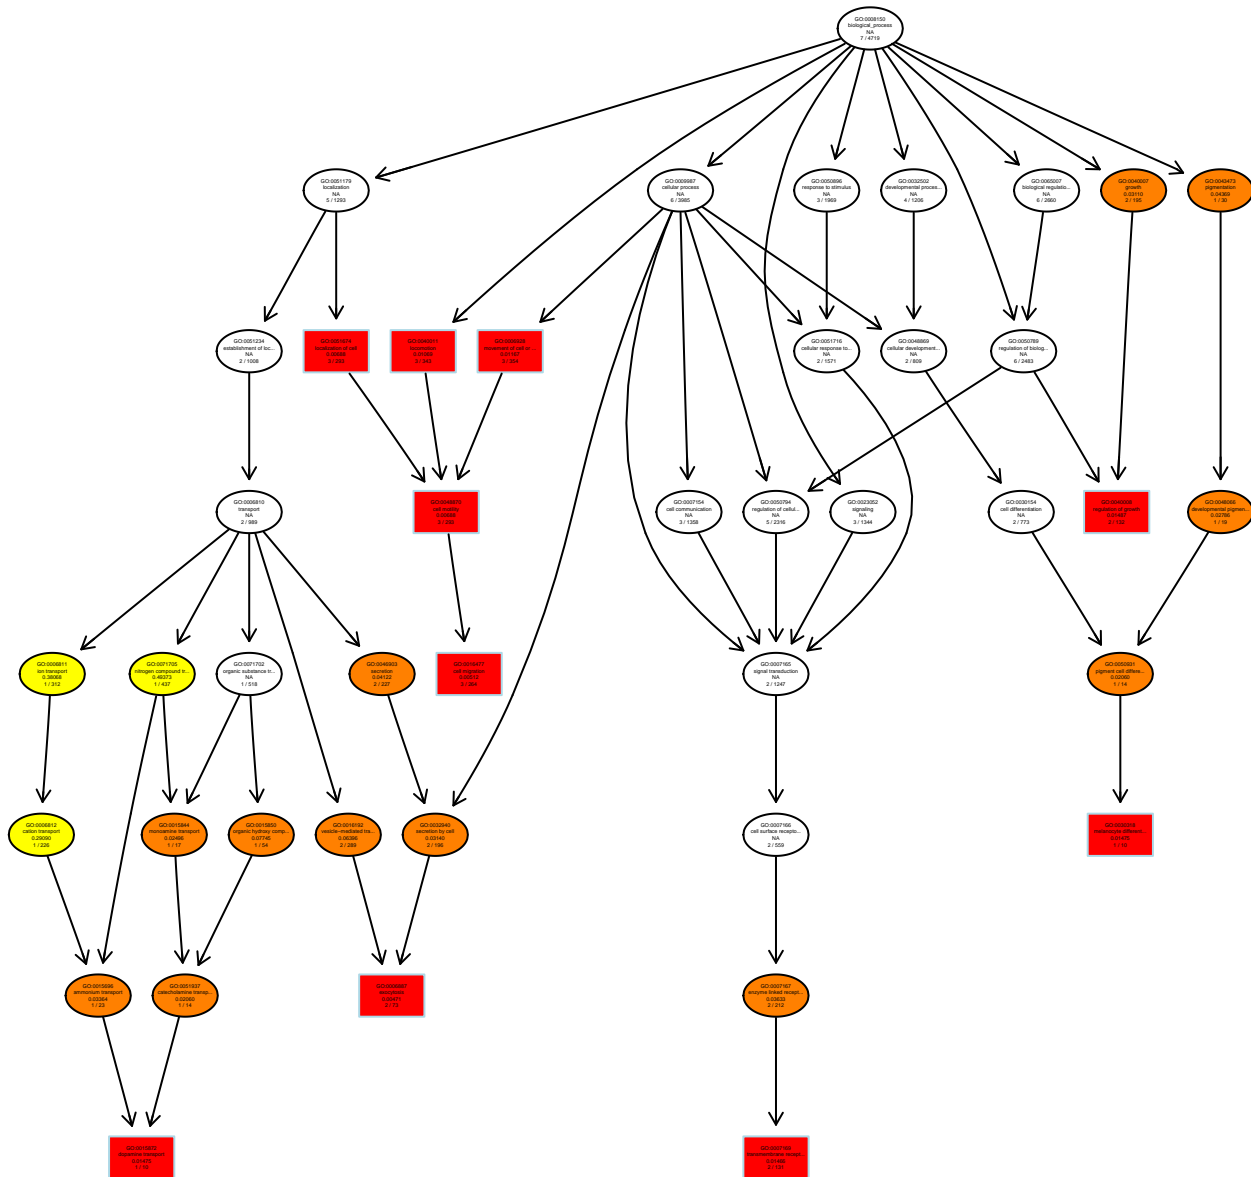

Supplement: s1 [file s1]

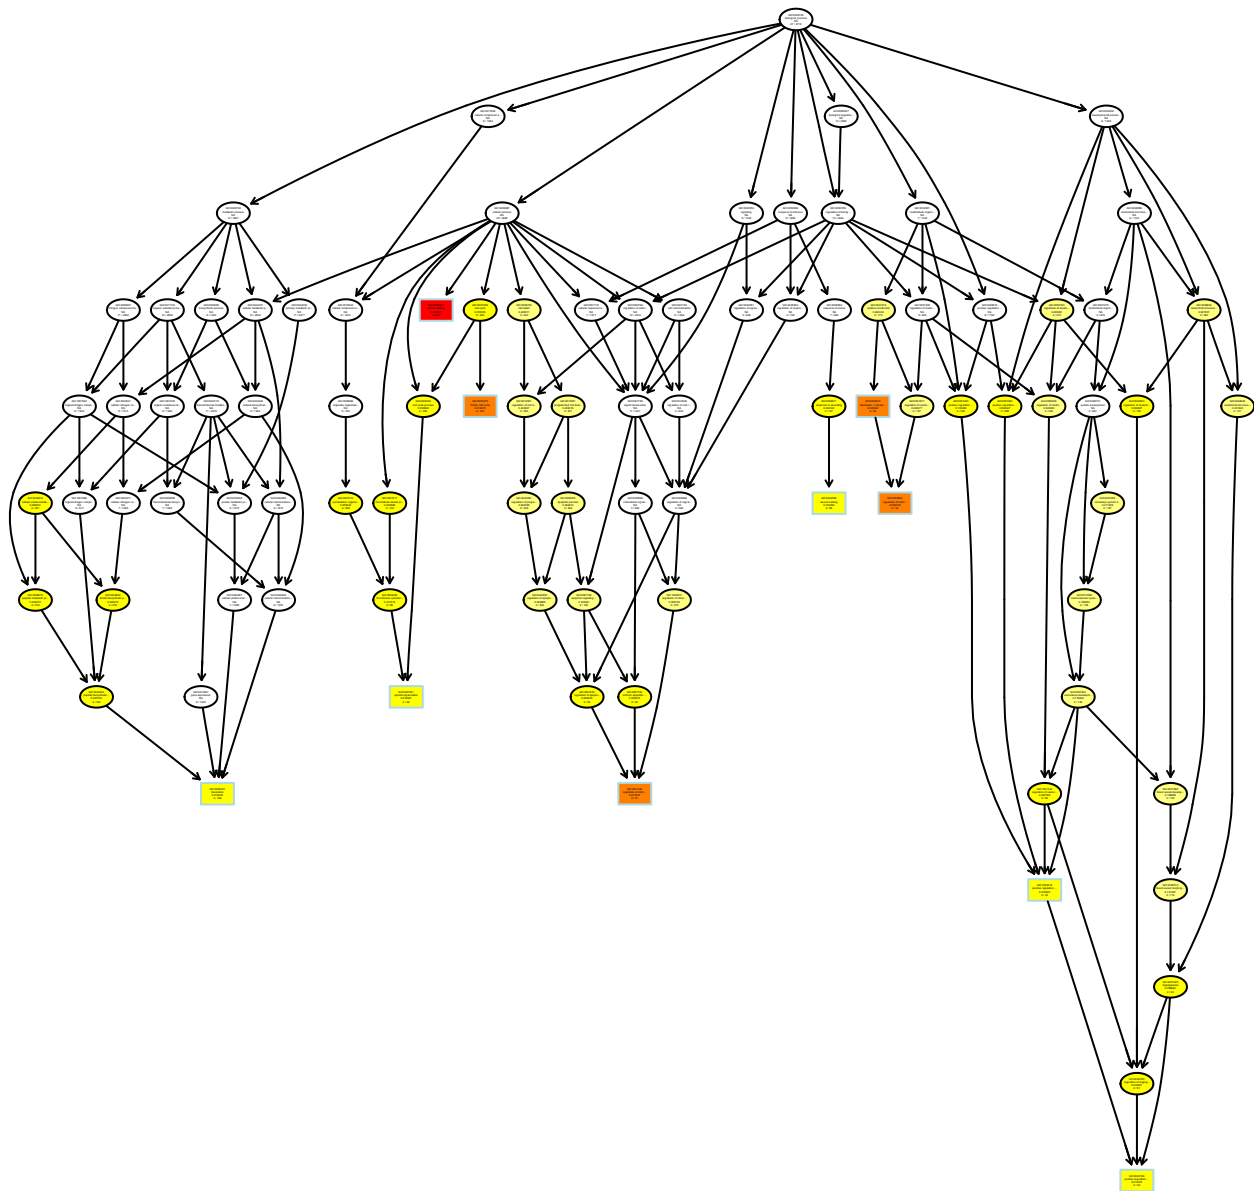

Supplement: s1 [file s1]

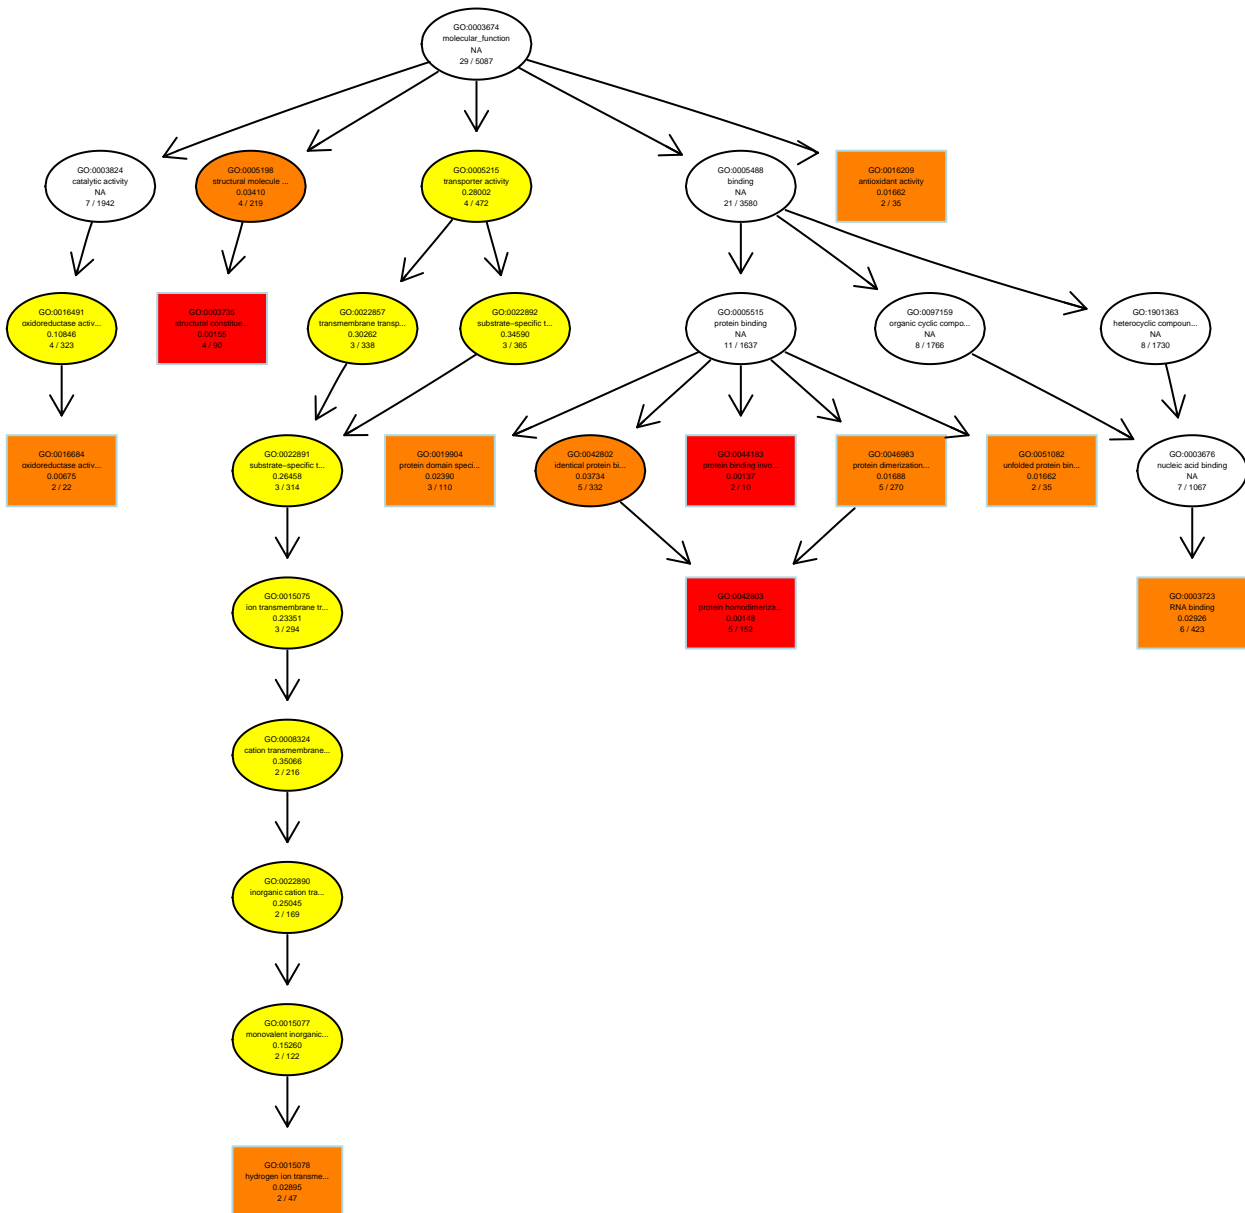

Supplement: s1 [file s1]
